## 1 **SARS-CoV-2 Heterogeneity by Ethnicity in Los Angeles**

2 Lao-Tzu Allan-Blitz, MD<sup>1</sup> Fred Hertlein, ME, MBA,<sup>2</sup> Jeffrey D. Klausner, MD, MPH<sup>3</sup>

3

4 1. Brigham and Women's Hospital, Boston, MA

5 2. Curative Inc. San Dimas, CA

6 3. Department of Preventative Medicine, Keck School of Medicine, University of  
7 Southern California

8

9 Compliance with Ethical Standards:

- 10 - Disclosures: Dr. Allan-Blitz has served as a consultant for Curative Inc. Dr.  
11 Klausner has served as the medical director of Curative Inc. during the  
12 observation period. Fred Hertlein has served as an employee of Curative Inc.  
13 during the observation period.
- 14 - Ethical Approval: This article does not contain any studies with human  
15 participants performed by any of the authors. The Mass General Brigham  
16 institutional review board deemed the analysis of de-identified data did not  
17 constitute human subjects' research (2020P003530).
- 18 - No informed consent was necessary.

19

20 Acknowledgements and Funding: The authors would like to acknowledge the city of Los  
21 Angeles. There was no funding for this study.

22

23 Word Count: 1,219

24 Abstract Word Count: 116

25 References: 19

26

27 **Corresponding Author Contact Information:**

28 Lao-Tzu Allan-Blitz

29 Department of Medicine, Brigham and Women's Hospital

30 75 Francis Street

31 Boston, MA 02115, USA

32 Email: [lallan-blitz@partners.org](mailto:lallan-blitz@partners.org), phone: (805) 896-5313

33

34 **Alternative Author Information:**

35 Dr. Jeffrey D. Klausner

36 Department of Preventative Medicine

37 Keck School of Medicine

38 University of Southern California

39 Los Angeles, CA 90033, USA

40 Email: [jdklausner@med.usc.edu](mailto:jdklausner@med.usc.edu)

41

42

43 **Abstract**

44           Recent studies have identified notable disparities in SARS-CoV-2 infection risk  
45 among ethnic minorities. We evaluated SARS-CoV-2 test results from individuals  
46 presenting for testing in Los Angeles between June-December, 2020. We calculated  
47 prevalence ratios for various employment categories. Among 518,914 test results, of  
48 which 295,295 (56.9%) were from individuals reporting Hispanic ethnicity, SARS-CoV-2  
49 positivity was 16.5% among Hispanic individuals compared to 5.0% among non-  
50 Hispanic individuals ( $p$ -value<0.01). The prevalence ratios comparing Hispanic and non-  
51 Hispanic individuals was highest for members of the media (PR=6.7; 95% CI 4.3-10.4),  
52 government employees (PR=4.0; 95% CI 3.3-4.9), and agricultural workers (PR=4.0;  
53 95% CI 3.2-5.0). Such heterogeneity warrants further investigation in order to develop  
54 targeted public health interventions towards specific drivers of SARS-CoV-2  
55 transmission.

56

## 57 **Background**

58           The impact of the SARS-CoV-2 pandemic has been disproportionately felt  
59 among Hispanic communities (1-3). The complex and interconnected structural and  
60 systemic factors that likely contribute to such disparities (4) are also likely driving the  
61 heterogeneity with which SARS-CoV-2 spreads (5, 6). Ironically, however, the broad  
62 business closures enforced in order to curb the pandemic may be less efficacious  
63 among minority and poorer communities, as such communities are less able to limit  
64 their mobility (e.g. working from home or limit within household contact due to dense  
65 housing and household occupancy) and are less likely to work in settings with regular  
66 testing or adequate ventilation, all of which may increase risk of SARS-CoV-2 infection  
67 (7). Even worse, such communities who have less financial security at the outset may  
68 feel the economic impacts of public health interventions most acutely (8, 9).

69           A new strategy, therefore, is desperately needed. In the wake of previous  
70 epidemics, targeted public health interventions have been made possible via a thorough  
71 understanding of factors that facilitate the transmission of disease. In response to the  
72 Human Immunodeficiency Virus (HIV) epidemic, for example, the HIV Prevention Trials  
73 Network has developed innumerable, novel, and cost-effective interventions that are  
74 tailored directly towards factors that drive infection (10). Similarly, targeted interventions  
75 may be possible for the SARS-CoV-2 pandemic if we are able to develop a more  
76 thorough understanding of the specific drivers among sub-populations at highest risk.

77           We therefore aimed to evaluate the risk of SARS-CoV-2 infection associated with  
78 different employment categories among Hispanic compared to White individuals, in  
79 order to unwind the details of factors that contribute to the disparity in burden of

80 infection. We performed that analysis among a community-based sample in Los Angeles  
81 as Los Angeles county is among the most populous counties in the United States and  
82 one of the most diverse, with 48.6% of those surveyed in the national census identifying  
83 as Hispanic (11).

84

## 85 **Methods**

86 We collected data from individuals presenting for SARS-CoV-2 polymerase chain  
87 reaction testing to one of 250 drive-through centers in Los Angeles county. Individuals  
88 presented between June-December, 2020. Specimens were collected via oral swabs  
89 and processed as has been previously reported (12). Data collected at the time of  
90 testing included age, gender, race and ethnicity, reported exposure to an individual  
91 known to be infected with SARS-CoV-2, report of symptoms (muscle aches, cough,  
92 fevers, diarrhea, nausea, headache, congestion, sore throat, anosmia, and shortness of  
93 breath), and type of employment from a pre-specified list. Laboratory data collected  
94 included human and viral cycle threshold values, date and time of testing.

95 We included data in our analysis for each individual test if there were no missing  
96 values for ethnicity, test result, and employment category. We then calculated the  
97 prevalence of SARS-CoV-2 test positivity by ethnicity and employment category as well  
98 as prevalence ratios and 95% confidence intervals (CI) for each employment category.  
99 The Mass General Brigham institutional review board deemed the analysis of de-  
100 identified data did not constitute human subjects' research (2020P003530).

101

## 102 **Results**

103 Overall, we analyzed 518,914 individual tests results, of which 296,052 (57.1%)  
104 were collected from women and 295,295 (56.9%) reported Hispanic ethnicity. The mean  
105 age of the population was 35 years (standard deviation 15.2). In all, 247,974 (47.8%)  
106 individuals reported any symptoms at the time of testing. SARS-CoV-2 positivity was  
107 16.5% among Hispanic individuals compared to 5.0% among non-Hispanic individuals  
108 ( $p$ -value<0.01). The percent of individuals who reported symptoms at the time of testing  
109 among those who tested positive was comparable among Hispanic (70.9%) and non-  
110 Hispanic individuals (69.8%). The table shows SARS-CoV-2 positivity by employment  
111 category as well as prevalence ratios and 95% confidence intervals.

112

## 113 Discussion

114 From a community-based sample of individuals presenting for testing in Los  
115 Angeles county, we identified a significant disparity in SARS-CoV-2 test positivity  
116 among Hispanic compared to non-Hispanic individuals. And though descriptive, we also  
117 identified notable heterogeneity in risk based on reported employment among Hispanic  
118 communities.

119 Many recent studies have demonstrated the disproportionate burden of SARS-  
120 CoV-2 infection suffered by minority races and ethnicities (1-4, 13-16). There are  
121 numerous factors that likely contribute to those findings, including the higher proportion  
122 of immigrant families without health insurance limiting the ability to seek care, language  
123 barriers impacting the quality of care received, financial insecurity resulting in need for  
124 potentially higher-risk employment or limiting the ability to work from home (17), and  
125 housing insecurity leading to denser household occupancy and thus increased risk for

126 transmission. The tangled web of those factors as well as innumerable others creates  
127 significant challenges in developing public health strategies that optimally address the  
128 needs of such communities. In order to untangle such a web, we must first be able to  
129 precisely describe the specific scenarios that perpetuate those disparities. Testing  
130 centers can be used to gather detailed exposure data (e.g. exposure to gyms, places of  
131 worship, parks, museums, hospitals, nursing homes, overnight camps, hotels, beaches,  
132 movie theaters, bars, restaurants, and airports) as well as dates of those exposures in  
133 order to understand when and how the transmission chains occur. Furthermore, such  
134 data should be collected among individuals who test positive as well as negative, as the  
135 comparison of risk will be essential in evaluating which types of exposures truly drive  
136 transmission.

137         Our results demonstrated notably higher prevalence ratios for Hispanic  
138 individuals employed as members of the media, agriculture workers, and government  
139 personnel compared to non-Hispanics with similar employment. A recent study similarly  
140 found increased risk for SARS-CoV-2 positivity among kitchen workers of minority races  
141 (18). Beyond the known structural inequities that most likely contribute to such  
142 differences, there may be ongoing disparities in division of labor within the workforce of  
143 essential workers in specific roles that additionally compounds the heightened risk for  
144 transmission. For example, Hispanic members of the media may be more likely than  
145 non-Hispanic members to work in settings that place them at higher risk for SARS-CoV-  
146 2 transmission and acquisition. One survey found that Hispanic individuals were more  
147 likely than White individuals to lose their job during the pandemic (19), which may  
148 suggest that the jobs held by Hispanic individuals were different in substance than their

149 White counterparts, and thus reflect ongoing discrepant positions held by different  
150 ethnicities. We did not have sufficient data, however, to evaluate other confounding  
151 factors, thus further research is needed to more deeply evaluate such findings.

152 Our study was also limited in that all participants were tested in one geographic  
153 region, thus potentially limiting the generalizability of our results. However, given the  
154 diversity within Los Angeles (mirrored partially among our sample), and the fact that Los  
155 Angeles in particular is an important case study of the ongoing socioeconomic  
156 disparities surrounding the SARS-CoV-2 pandemic, we do not feel that limitation  
157 reduces the importance of our results. Our study is additionally limited in that we were  
158 unable to adjust our analysis based on socioeconomic status, and thus our results may  
159 be confounded, thus further research is warranted.

160

## 161 **Conclusion**

162 Our results add further support to the existing body of research identifying  
163 notable disparities in SARS-CoV-2 test positivity among ethnic minorities. Furthermore,  
164 in an attempt to explore the heterogeneity in SARS-CoV-2 transmission within Hispanic  
165 compared to non-Hispanic communities we reported prevalence ratios for various  
166 employment categories, noting that several demonstrated significantly higher risk for  
167 infection. Further research is needed in order to precisely identify factors driving  
168 transmission within high-risk populations and thereby develop tailored public health  
169 interventions.

170

171 **References**

- 172 1. Ogedegbe G, Ravenell J, Adhikari S, et al. Assessment of Racial/Ethnic Disparities in  
173 Hospitalization and Mortality in Patients With COVID-19 in New York City. *JAMA Netw Open*.  
174 2020;3(12):e2026881.
- 175 2. Anand S, Montez-Rath M, Han J, et al. Prevalence of SARS-CoV-2 antibodies in a large  
176 nationwide sample of patients on dialysis in the USA: a cross-sectional study. *Lancet*. 2020.
- 177 3. Macias Gil R, Marcelin JR, Zuniga-Blanco B, Marquez C, Mathew T, Piggott DA. COVID-19  
178 Pandemic: Disparate Health Impact on the Hispanic/Latinx Population in the United States. *J*  
179 *Infect Dis*. 2020.
- 180 4. Page KR, Flores-Miller A. Lessons We've Learned - Covid-19 and the Undocumented  
181 Latinx Community. *N Engl J Med*. 2021;384(1):5-7.
- 182 5. Britton T, Ball F, Trapman P. A mathematical model reveals the influence of population  
183 heterogeneity on herd immunity to SARS-CoV-2. *Science*. 2020;369(6505):846-9.
- 184 6. Centers for Disease Control and Prevention. COVID Data Tracker: Integrated County  
185 View. Available at: [https://covid.cdc.gov/covid-data-](https://covid.cdc.gov/covid-data-tracker/?CDC_AA_refVal=https%3A%2F%2Fwww.cdc.gov%2Fcoronavirus%2F2019-ncov%2Fcases-updates%2Fcases-in-us.html#county-view)  
186 [tracker/?CDC\\_AA\\_refVal=https%3A%2F%2Fwww.cdc.gov%2Fcoronavirus%2F2019-](https://covid.cdc.gov/covid-data-tracker/?CDC_AA_refVal=https%3A%2F%2Fwww.cdc.gov%2Fcoronavirus%2F2019-ncov%2Fcases-updates%2Fcases-in-us.html#county-view)  
187 [ncov%2Fcases-updates%2Fcases-in-us.html#county-view](https://covid.cdc.gov/covid-data-tracker/?CDC_AA_refVal=https%3A%2F%2Fwww.cdc.gov%2Fcoronavirus%2F2019-ncov%2Fcases-updates%2Fcases-in-us.html#county-view) Accessed 11/30/20. 2020.
- 188 7. Chang S PE, Wei Koh P, Geradin J, Redbird B, Grusky D, Leskovec J. Mobility network  
189 models of COVID-19 explain inequities and inform reopening. *Nature*  
190 <https://doi.org/10.1038/s41586-020-2923-3>. 2020.
- 191 8. Usman M, Ali Y, Riaz A, Riaz A, Zubair A. Economic perspective of coronavirus (COVID-  
192 19). *J Public Aff*. 2020:e2252.

- 193 9. Nicola M, Alsafi Z, Sohrabi C, et al. The socio-economic implications of the coronavirus  
194 pandemic (COVID-19): A review. *Int J Surg.* 2020;78:185-93.
- 195 10. HIV Prevention Trials Network. Available at: <https://www.hptn.org/> Accessed February  
196 3, 2021.
- 197 11. United States Census Bureau. Table B03002. Hispanic or Latino Origin by Race. Available  
198 at:  
199 <https://data.census.gov/cedsci/table?q=B03002&g=0500000US06037&tid=ACSDT1Y2019.B030>  
200 [02&hidePreview=true](https://data.census.gov/cedsci/table?q=B03002&g=0500000US06037&tid=ACSDT1Y2019.B030) Accessed February 2, 2021.
- 201 12. Kojima N, Turner F, Slepnev V, et al. Self-Collected Oral Fluid and Nasal Swab Specimens  
202 Demonstrate Comparable Sensitivity to Clinician-Collected Nasopharyngeal Swab Specimens for  
203 the Detection of SARS-CoV-2. *Clin Infect Dis.* 2020.
- 204 13. Wadhera RK, Wadhera P, Gaba P, et al. Variation in COVID-19 Hospitalizations and  
205 Deaths Across New York City Boroughs. *JAMA.* 2020;323(21):2192-5.
- 206 14. Killerby ME L-GR, Haight SC, Schrodtt CA, England L, Gomes DJ, Shamout M, Pettrone K,  
207 O’Laughlin K, Kimball A, Blau EF, Burnett E, Ladva CN, Szablewski CM, Tobin-D’Angelo M,  
208 Oosmanally N, Drenzek DVM, Murphy DJ, Blum JM, Hollberg J, Lefkove B, Brown FW,  
209 Shimabukuro R, Midgley CM, Tate JE. Characteristics Associated with Hospitalization Among  
210 Patients with COVID-19 - Metropolitan Atlanta, Georgia, March-April 2020. *MMWR Morb*  
211 *MOrtal Wkly Rep.* 2020;69:790-794.
- 212 15. Price-Haywood EG, Burton J, Fort D, Seoane L. Hospitalization and Mortality among  
213 Black Patients and White Patients with Covid-19. *N Engl J Med.* 2020;382(26):2534-43.

- 214 16. Millett GA, Jones AT, Benkeser D, et al. Assessing differential impacts of COVID-19 on  
215 black communities. *Ann Epidemiol.* 2020;47:37-44.
- 216 17. News Release: Bureau of Labor Statistics. US Department of Labor. Job Flexibilities and  
217 Work Schedules 2017-2018. Published September 2019. Available at:  
218 <https://www.bls.gov/news.release/pdf/flex2.pdf> Accessed February 5th, 2021.
- 219 18. Chen YH GM, Riley A, Balmes J, Duchowny Kate, Harrison R, Matthay E, Bibbins-Domingo  
220 K. Excess mortality associated with the COVID-19 pandemic among Californians 18–65 years of  
221 age, by  
222 occupational sector and occupation: March through October 2020. medRxiv. Available at:  
223 <https://www.medrxiv.org/content/10.1101/2021.01.21.21250266v1.full.pdf> 2021.
- 224 19. Guskin E. Hispanics are Almost Twice as Likely as Whites to Have Lost Their Jobs Amid  
225 the Pandemic, Poll Finds. *The Washington Post.* 2020.
- 226
- 227
- 228
- 229
- 230

231 **Table: SARS-CoV-2 Positivity Among Hispanic and Non-Hispanic Individuals, Los**  
 232 **Angeles June-December, 2020**  
 233

|                                    | SARS-CoV-2 Positivity   |                             |                              |
|------------------------------------|-------------------------|-----------------------------|------------------------------|
|                                    | Hispanic<br>(n=295,295) | Non-Hispanic<br>(n=223,619) | Prevalence<br>Ratio (95% CI) |
| <b>Overall</b>                     | 16.5%                   | 5.0%                        | 3.3 (3.2 – 3.4)              |
| <b>Employment*</b> (n=518,914)     |                         |                             |                              |
| Agriculture (n=4,415)              | 25.9%                   | 6.5%                        | 4.0 (3.2 – 5.0)              |
| Construction (n=23,584)            | 16.4%                   | 5.0%                        | 3.2 (2.9 – 3.6)              |
| Correctional Facility (n=2,038)    | 18.3%                   | 7.1%                        | 2.6 (1.9 – 3.4)              |
| Delivery or Ride-Share (n=16,746)  | 12.4%                   | 3.2%                        | 3.9 (3.3 – 4.3)              |
| Disability Care (n=18,829)         | 18.1%                   | 8.7%                        | 2.1 (1.9 – 2.3)              |
| Education (n=59,595)               | 13.1%                   | 3.6%                        | 3.6 (3.4 – 3.9)              |
| Elderly Care (n=10,294)            | 9.0%                    | 2.7%                        | 3.3 (2.8 – 4.1)              |
| Emergency Services (n=13,173)      | 14.4%                   | 5.7%                        | 2.5 (2.2 – 2.9)              |
| Frist Responder (n=15,150)         | 11.6%                   | 4.2%                        | 2.8 (2.4 – 3.1)              |
| Food Services (n=85,497)           | 21.2%                   | 6.5%                        | 3.3 (3.1 – 3.4)              |
| Government Personnel (n=13,646)    | 7.3%                    | 1.8%                        | 4.0 (3.3 – 4.9)              |
| Grocery Store (n=30,818)           | 12.7%                   | 3.5%                        | 3.6 (3.2 – 4.0)              |
| Health Care (n=157,684)            | 14.0%                   | 4.7%                        | 3.0 (2.9 – 3.1)              |
| Member of Media (n=4,715)          | 5.3%                    | 0.8%                        | 6.7 (4.3 – 10.4)             |
| Public Transportation (n=9,039)    | 20.1%                   | 9.1%                        | 2.2 (1.9 – 2.5)              |
| Retail or Manufacturing (n=92,958) | 20.8%                   | 6.9%                        | 3.0 (2.9 – 3.1)              |

234 \* Data were collected beginning September 2020

235

236 The table shows SARS-CoV-2 test positivity among Hispanic and non-Hispanic  
 237 individuals by type of employment as well as the prevalence ratio and 95% confidence  
 238 intervals for each employment category.
